# Supplementary material for: Fourier-inspired Automatic Cobb Angles Measurement for Adolescent Idiopathic Scoliosis
Source: Research Square preprint supplement (doi:10.21203/rs.3.rs-6010694/v1), 2025-04-23
Supplement: Supplementary file 1 [file 671bdc4e28ceac4957c753b5.docx]

**Supplementary information:**

**Fourier-inspired Automatic Cobb Angles Measurement for Adolescent Idiopathic Scoliosis**


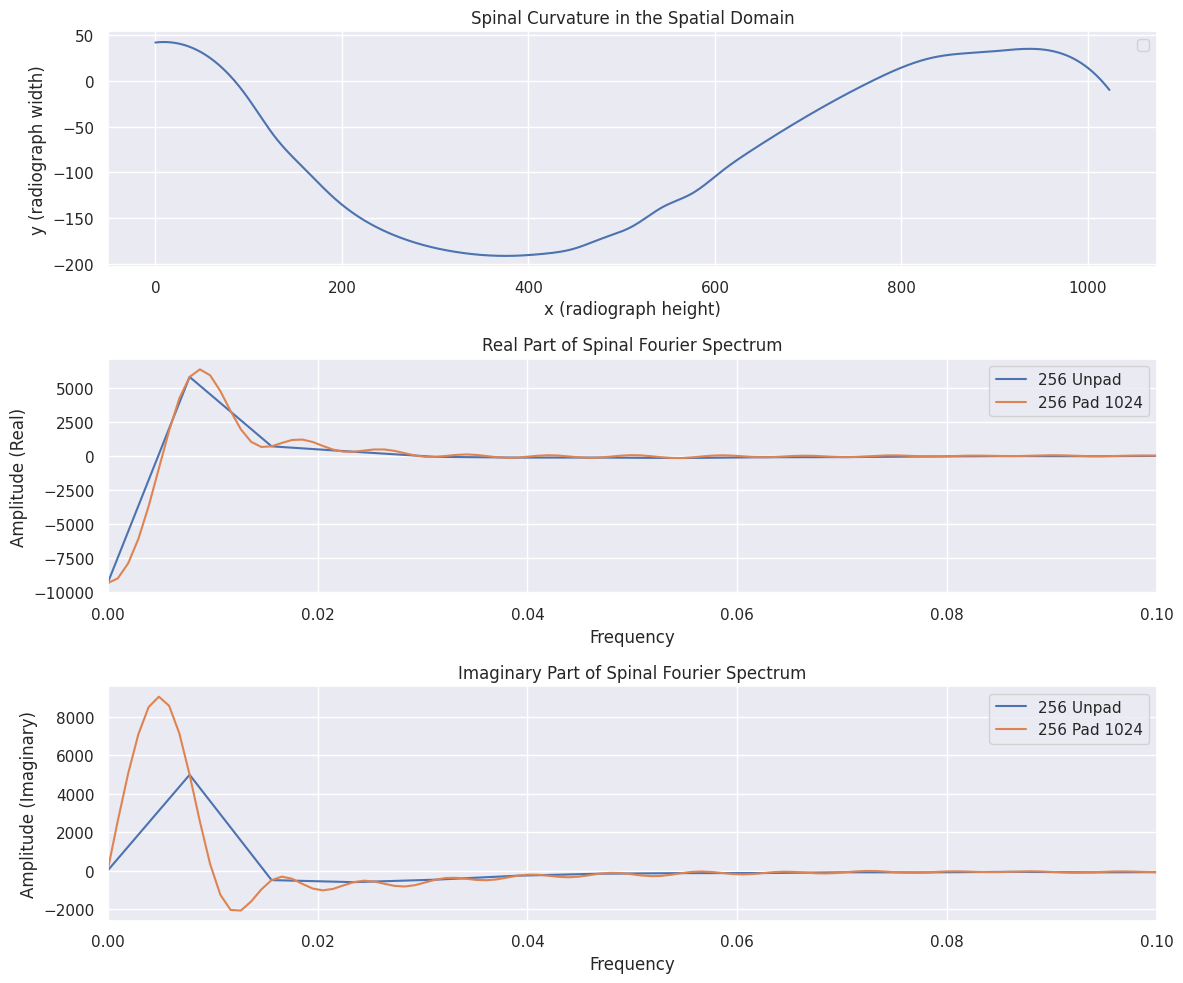


**Supplementary Figure S1.** Zero padding in the spatial domain before applying Fourier transform helps obtaining a higher resolution of spectrum. As visualized, a 256-dimensional unpad sequence is associated with a rougher spectrum. This behavior explains the better performance with the model with padding applied.


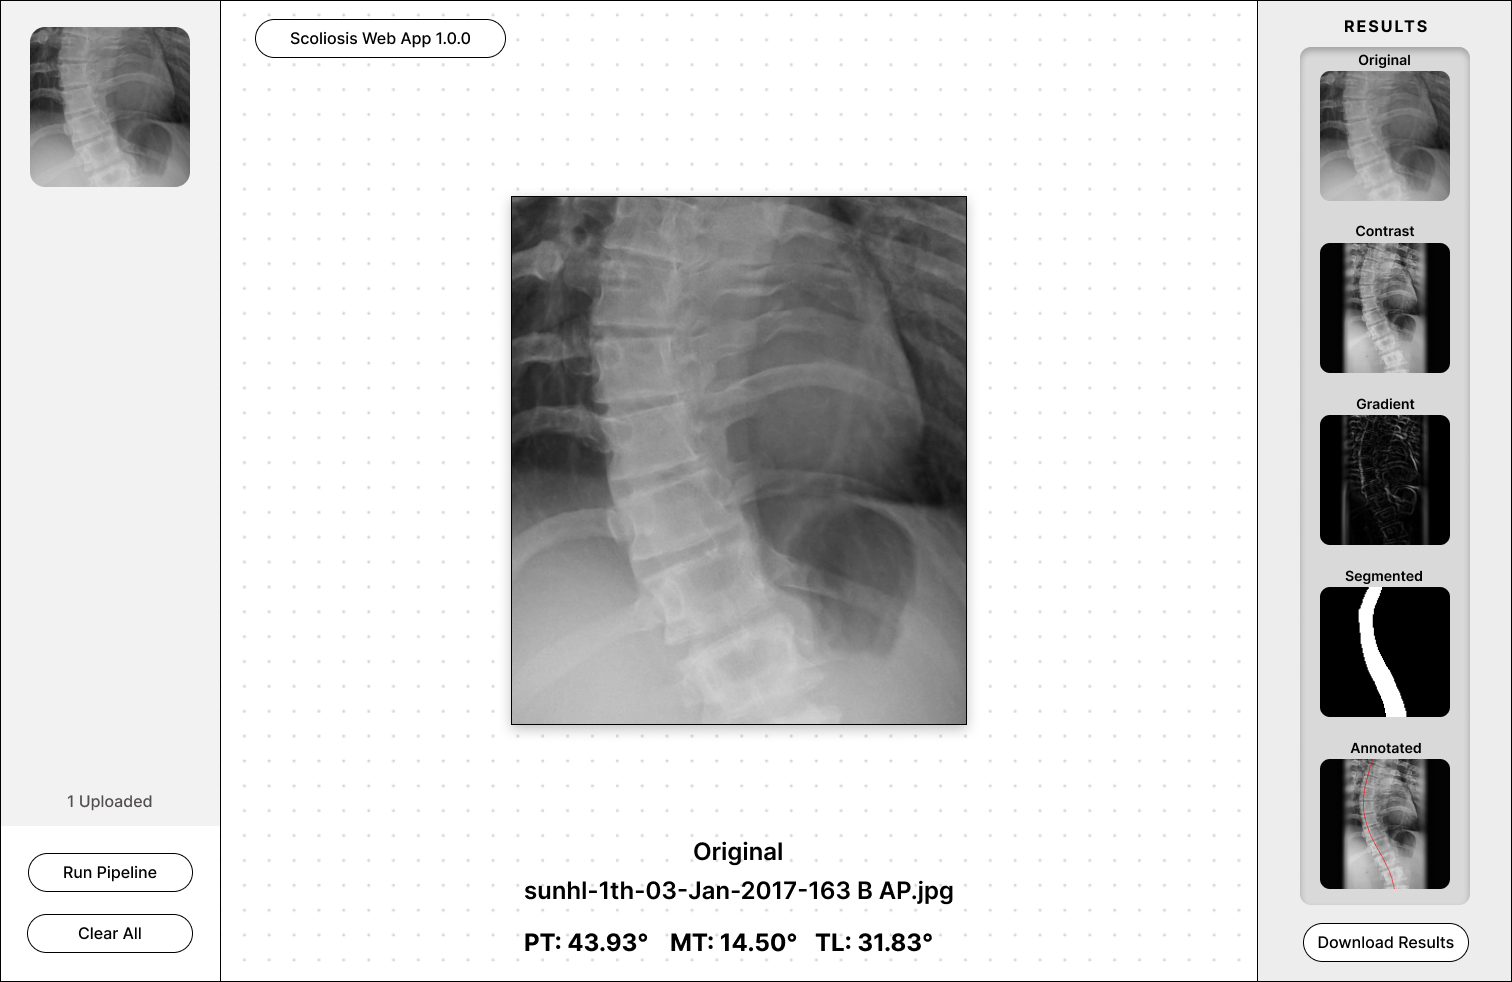


**Supplementary Figure S2.** The prototype Cobb angles measurement application, when working in conjunction with a hand-held X-ray device, may provide an ideal solution for scoliosis screening in resource-constrained environments.


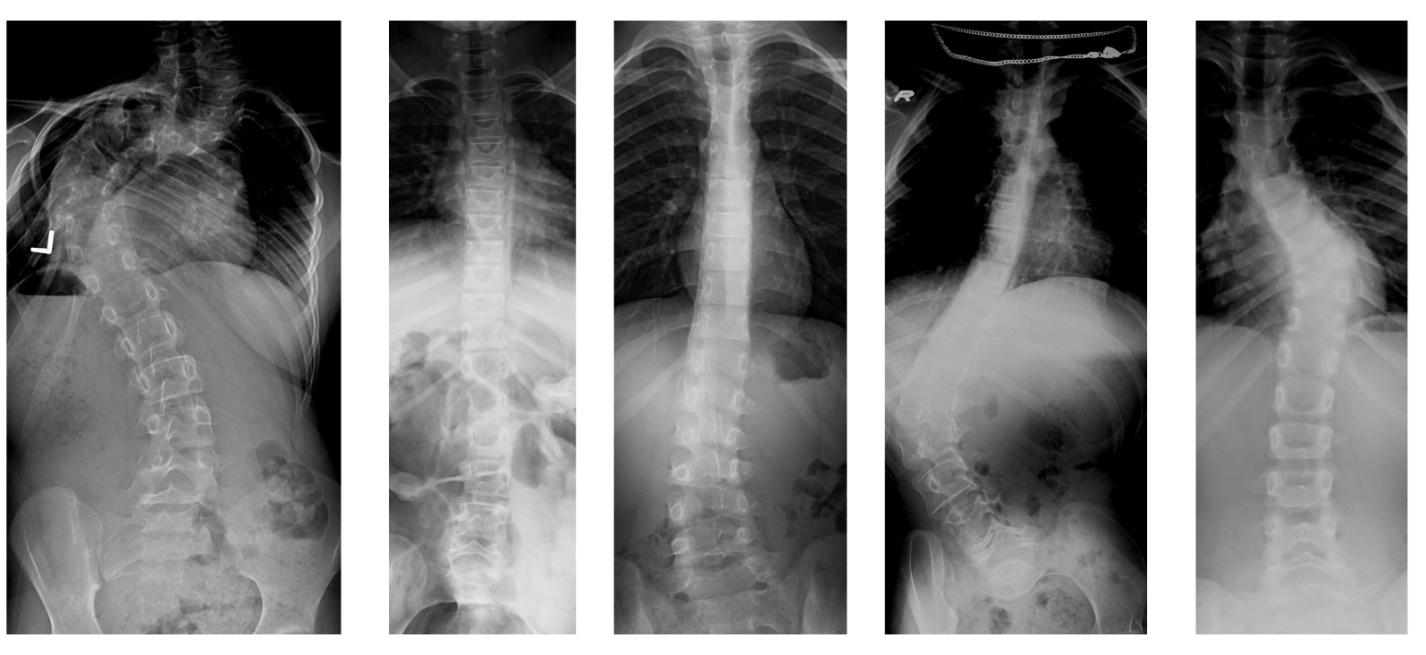


**Supplementary Figure S3.** Sample radiographs from the MICCAI 2019 scoliosis dataset. The images show varied heights and widths, so data preprocessing is critical.


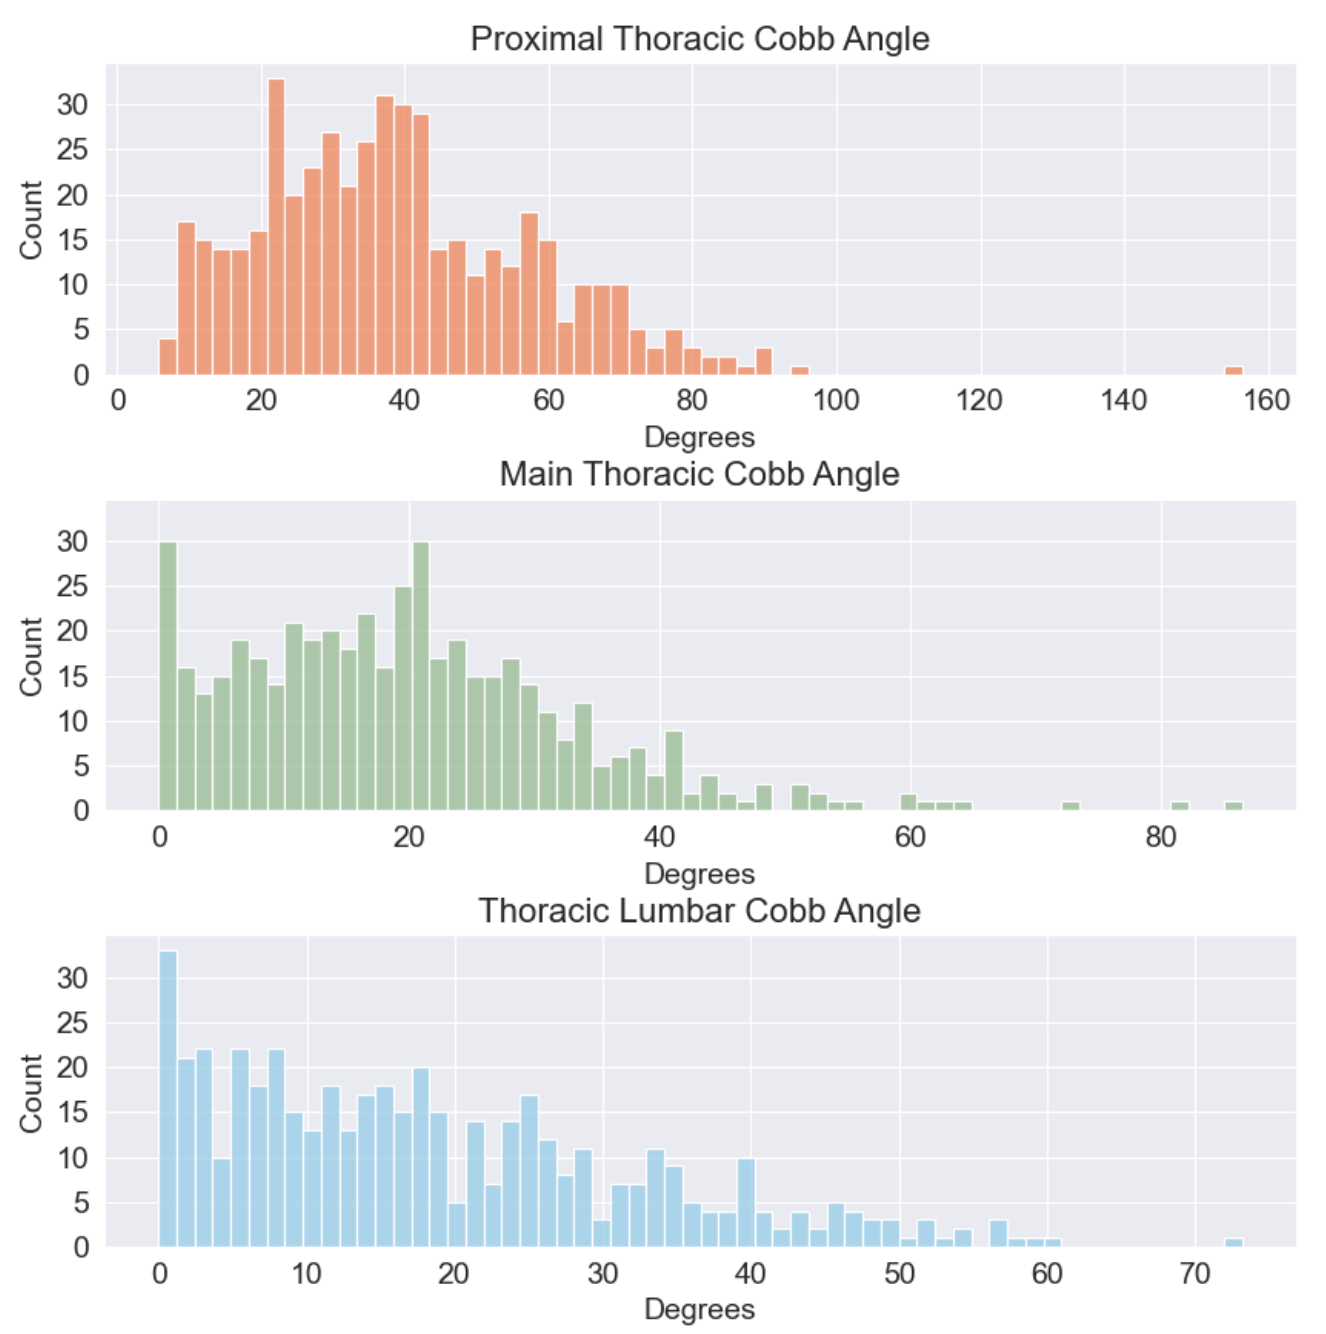


**Supplementary Figure S4.** The distribution of Cobb angles. Every image is labeled with three Cobb angles. The distribution of the TL angles shows a high standard deviation.


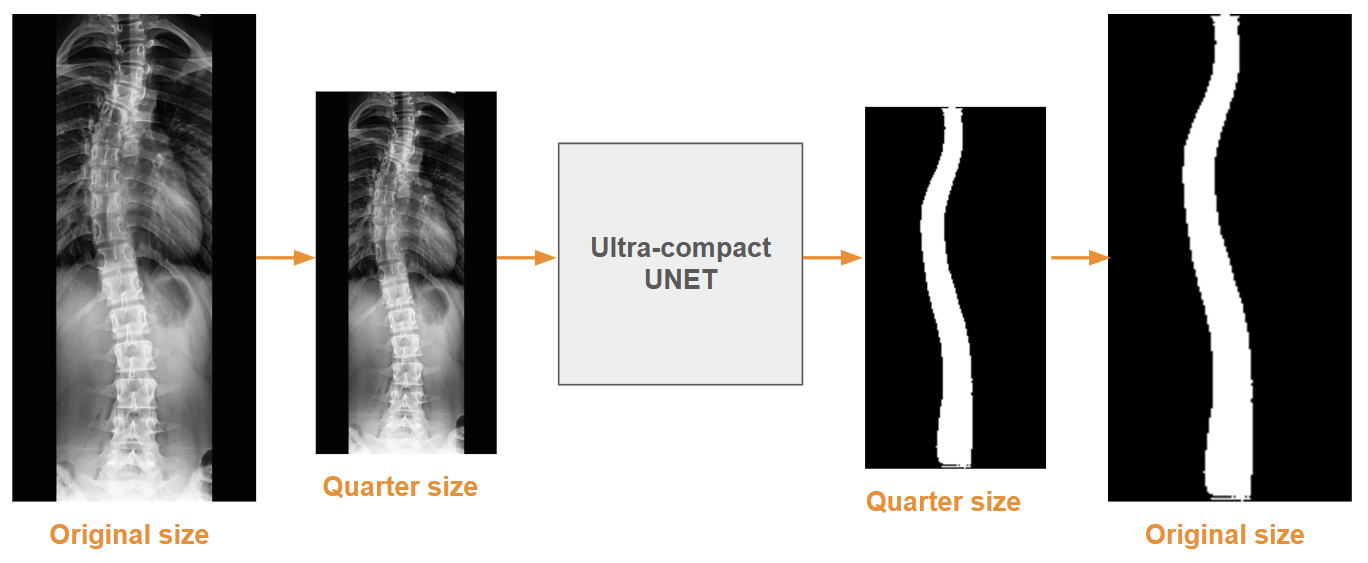


**Supplementary Figure S5.** The U-NET generated the predicted segmentation mask as one of the three input channels to the spectrum prediction model. To keep the pipeline compact, the input radiograph is resized to a quarter of its width and height. In the output, the segmented image is reverted to the original dimension.


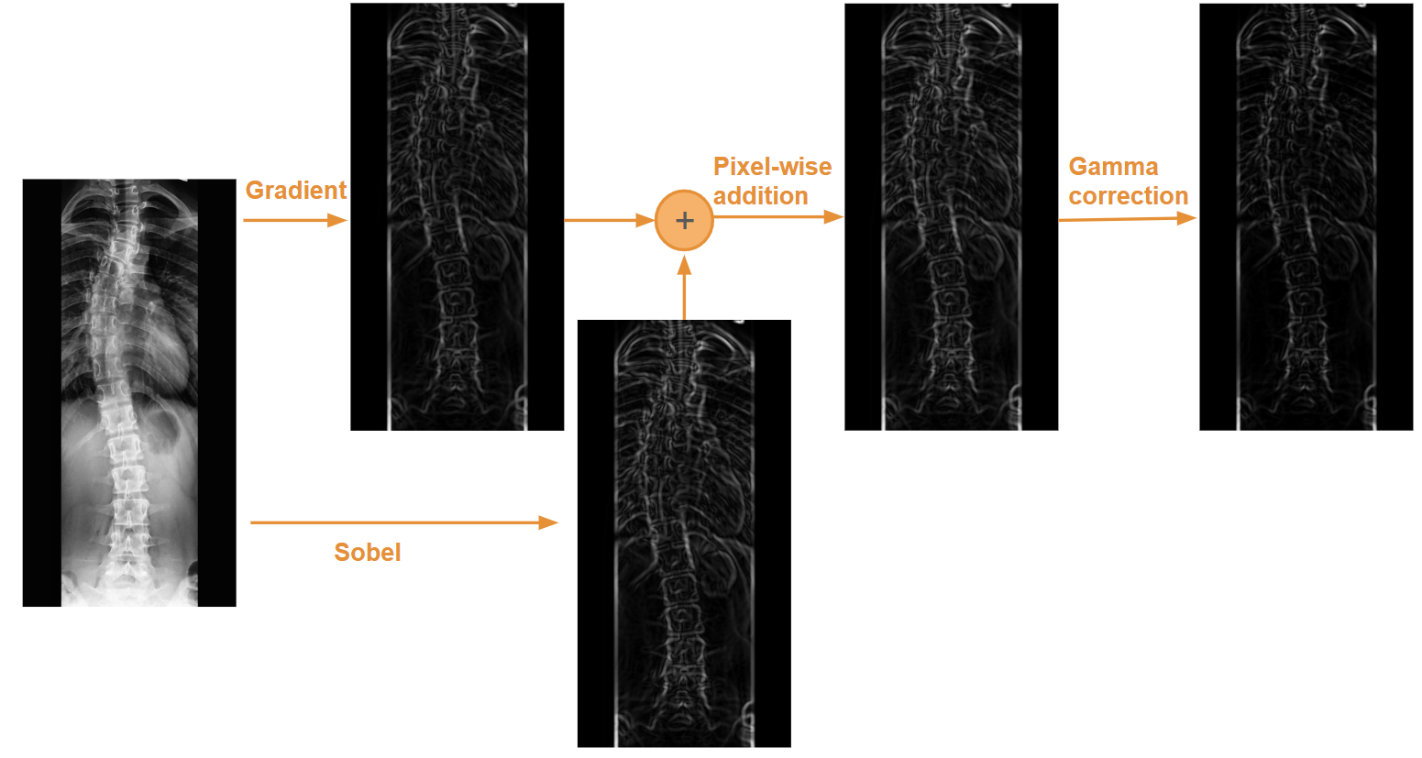


**Supplementary Figure S6.** The gradient channel emphasizes the bone edges while suppressing the rest. The gradient channel is a scaled pixel-wise addition of the LaPlacian of the radiograph and the Sobel-filtered image.
